# Supplementary material for: Structure of the CRISPR Interference Complex CSM Reveals Key Similarities with Cascade
Source: PubMed Central journal article supplement (PMC3807668; doi:10.1016/j.molcel.2013.08.020), 2013-10-10
Supplement: mmc1.pdf [file mmc1.pdf]

## Supplemental Information

## Structure of the CRISPR Interference Complex CSM

## Reveals Key Similarities with Cascade

Christophe Rouillon, Min Zhou, Jing Zhang, Argyris Politis, Victoria Beilsten, Giuseppe Cannone, Shirley Graham, Carol V. Robinson, Laura Spagnolo, and Malcolm F. White

**Table S1. Distribution of CSM-Bound crRNA Matches to the *S. solfataricus* P1 CRISPR Loci.** (related with Figure 1)

| CRISPR Locus                | A       | B       | C      | D      | E     | F     |
|-----------------------------|---------|---------|--------|--------|-------|-------|
| Size of locus (nt)          | 5677    | 3943    | 2124   | 11334  | 410   | 6033  |
| RNA matches                 | 3060221 | 1805666 | 204202 | 327035 | 139   | 52613 |
| % of total matches          | 56.1    | 33.1    | 3.75   | 6.0    | 0.003 | 0.97  |
| Density<br>(matches per nt) | 539     | 458     | 96     | 29     | 0.3   | 9     |

**Table S2. Measured Subunit Masses and Post-translational Modifications Identified for the CSM Complex** (related with figure 3)

| Uniprot ID | Subunit Name | Post-translational modifications                                                                                                                   | Expected Mw (Da) | Measured Mw (Da) <sup>a</sup> | Measured Mw (Da) <sup>b</sup> |
|------------|--------------|----------------------------------------------------------------------------------------------------------------------------------------------------|------------------|-------------------------------|-------------------------------|
| Q97YA8     | Sso1424      | Loss of first 15 residues; Acetylation Ser-1; Methylation R76,K85,K92,R94,K130,K138                                                                | 15,948           | 14,082                        | 14,082                        |
| Q97YA2     | Sso1430      | Methylation K97, K181, K184, K206                                                                                                                  | 23,200           | 23,226                        | 23,225                        |
| Q97YA7     | Sso1425      | Methylation K95, K241, Phosphorylation T138                                                                                                        | 27,939           | 27,799                        | 27,619                        |
| Q97YA0     | Sso1432      | Methylation K47, R51, K69, K70, K82                                                                                                                | 28,917           | 28,846                        | 28,799                        |
| Q97YA6     | Sso1426      | Methylation K247, K265, K275, K280/281                                                                                                             | 31,527           | 31,040                        | 31,028                        |
| Q97YA5     | Sso1427      | Methylation K65/66, K86, K176, K192, K203/206, K221, K257, K264                                                                                    | 30,939           | 31,086                        | 31,095                        |
| Q97YA1     | Sso1431      | Methylation K9, K93, K130, K215, K231/235, Phosphorylation S227, T232                                                                              | 34,895           | 37,411                        | 34,914                        |
| Q97YA4/3   | Sso1428      | Methylation K39, K110, K118/119, K204, K217, R222, K256, K263, K298/R299, K312, K443, K687/693, K712, K720, K722, K749, R761/K762, K804, K812/R814 | 94,757           | 95,005                        | 97,567                        |

CSM purified with 10×His-tag attached to the subunit Sso1431<sup>a</sup> and Sso1428<sup>b</sup>

**Table S3. Synthetic Labelled Di-peptides for Quantification** (related with figure 3)

| Labelled Di-peptides                              | labelled residues | Reference subunit | Target subunit |
|---------------------------------------------------|-------------------|-------------------|----------------|
| <sup>1</sup> GSVDLNYLRVGGGQEVGDNVIR <sup>22</sup> | R9;R22            | Sso1428           | Sso1432        |
| <sup>1</sup> GSVDLNYLRISDLSSILNK <sup>19</sup>    | R9;K19            | Sso1428           | Sso1431        |
| <sup>1</sup> GSVDLNYLRLLYSILDLR <sup>19</sup>     | R9;R19            | Sso1428           | Sso1430        |
| <sup>1</sup> GSVDLNYLRYLWEAENK <sup>17</sup>      | R9;R17            | Sso1428           | Sso1430        |
| <sup>1</sup> GSVDLNYLRFDSLPISYSLNTR <sup>23</sup> | R9;R23            | Sso1428           | Sso1426        |
| <sup>1</sup> GSVDLNYLRSLVESYTK <sup>17</sup>      | R9;K17            | Sso1428           | Sso1425        |
| <sup>1</sup> GSVDLNYLRIFNPDPNR <sup>17</sup>      | R9;R17            | Sso1428           | Sso1427        |
| N-acetyl-sSQDLLDIATRGSVDLNYLR <sup>19</sup>       | R10;R19           | Sso1428           | Sso1424        |

**Table S4. List of Hits (within ±10% error) Searching for Mass Measured for the Intact CSM Complex (427,789Da)** (related with Table 1)

| Sso<br>1424 | Sso<br>1430 | Sso<br>1425 | Sso<br>1432 | Sso<br>1426 | Sso<br>1427 | Sso<br>1431 | Sso<br>1428 | crRNA    | Expected<br>mass (Da) | Error<br>(%) |
|-------------|-------------|-------------|-------------|-------------|-------------|-------------|-------------|----------|-----------------------|--------------|
| <b>3</b>    | <b>1</b>    | <b>1</b>    | <b>1</b>    | <b>4</b>    | <b>1</b>    | <b>1</b>    | <b>1</b>    | <b>1</b> | <b>426,374</b>        | <b>-0.3%</b> |
| 4           | 1           | 1           | 1           | 4           | 1           | 1           | 1           | 1        | 440,458               | +3.0%        |
| 3           | 1           | 2           | 1           | 4           | 1           | 1           | 1           | 1        | 454,173               | +6.2%        |
| 3           | 1           | 1           | 1           | 5           | 1           | 1           | 1           | 1        | 457,414               | +6.9%        |
| 4           | 1           | 2           | 1           | 4           | 1           | 1           | 1           | 1        | 468,257               | +9.5%        |

**Table S5. Experimentally Determined Masses of CSM Complex and Subcomplexes<sup>a</sup>** (related with figure 3)

| CSM complexes                                                                                               | Expected Mass (Da) | Mass | Experimental Mass (Da) | Error (%) |
|-------------------------------------------------------------------------------------------------------------|--------------------|------|------------------------|-----------|
| Intact: (Sso1424) <sub>3</sub> crRNA Sso1430 Sso1425 Sso1432 (Sso1426) <sub>4</sub> Sso1427 Sso1431 Sso1428 | 426,374            |      | 427,789 <sup>a</sup>   | 0.3       |
| – Sso1424                                                                                                   | 412,458            |      | 413,752                | 0.3       |
| – Sso1428                                                                                                   | 328,742            |      | 329,828                | 0.3       |
| – Sso1426                                                                                                   | 395,502            |      | 396,778                | 0.3       |
| – (Sso1424) <sub>2</sub> Sso1425                                                                            | 370,575            |      | 371,437                | 0.2       |
| – (Sso1424) <sub>2</sub> Sso1425 Sso1432                                                                    | 341,775            |      | 342,358                | 0.2       |
| – (Sso1424) <sub>3</sub> Sso1425 Sso1432                                                                    | 327,691            |      | 328,396                | 0.2       |
| – (Sso1424) <sub>3</sub> Sso1425                                                                            | 356,491            |      | 357,318                | 0.2       |
| – (Sso1424) <sub>3</sub> Sso1425 Sso1426                                                                    | 325,451            |      | 326,201                | 0.2       |
| + Sso1430 Sso1426 Sso1427 Sso1431 Sso1428                                                                   | 217,751            |      | 217,862                | 0.1       |
| + Sso1430 Sso1427 Sso1431 Sso1428                                                                           | 186,711            |      | 186,826                | 0.1       |
| + Sso1426 Sso1427 Sso1431 Sso1428                                                                           | 194,525            |      | 194,722                | 0.1       |
| + Sso1430 Sso1431 Sso1428                                                                                   | 155,621            |      | 155,784                | 0.1       |
| + Sso1427 Sso1431 Sso1428                                                                                   | 163,485            |      | 162,665                | 0.1       |
| + Sso1430 Sso1428                                                                                           | 120,726            |      | 120,804                | 0.1       |
| + (Sso1424) <sub>2</sub>                                                                                    | 28,168             |      | 28,199                 | 0.1       |
| + Sso1424 Sso1425                                                                                           | 41,883             |      | 41,935                 | 0.1       |
| + Sso1424 Sso1427                                                                                           | 45,174             |      | 45,230                 | 0.1       |
| + Sso1426 Sso1426/7                                                                                         | 62,130             |      | 62,201                 | 0.1       |
| + Sso1425 Sso1432                                                                                           | 56,599             |      | 56,669                 | 0.1       |

<sup>a</sup>Mass measured for the intact CSM purified by tagging the subunit Sso1428

**Table S6. Inter-subunit Contacts Established for CSM *via* Chemical Crosslinking** (related with figure 3)

| Crosslinks | Charge | m/z    | MH <sup>+</sup> (monoisotopic) | Sequences             | Subunits <sup>a</sup> |
|------------|--------|--------|--------------------------------|-----------------------|-----------------------|
| 1          | 5      | 428.61 | 2139.03                        | EAHK(\$1)NGVCDVCK     | 1430(71)-1429(108)    |
|            | 4      | 535.51 |                                | MFK(\$1)R             |                       |
| 2          | 3      | 743.09 | 2227.25                        | SLVESYTK(\$1)SLNDSK   | 1425(72)-1426(16)     |
|            | 4      | 557.57 |                                | VIK(\$1)R             |                       |
| 3          | 4      | 360.96 | 1440.80                        | SDLK(\$1)NYR K(\$1)EK | 1429(175)-1431(91)    |
|            | 3      | 480.94 |                                |                       |                       |
| 4          | 4      | 490.80 | 1960.17                        | LLLASLK(\$1)DR        | 1424(92)-1427(53)     |
|            | 3      | 652.72 |                                | SVSDVK(\$1)R          |                       |
| 5          | 4      | 387.99 | 1548.93                        | AK(\$1)SVEALK         | 1425(187)-1432(168)   |
|            |        |        |                                | K(\$1)ASEK            |                       |
| 6          | 3      | 690.70 | 2070.09                        | SLVESYTK(\$1)SLNDSK   | 1425(72)-1432(165)    |
|            |        |        |                                | K(\$1)SK              |                       |
| 7          | 3      | 603.35 | 1808.05                        | EDIK(\$1)FKLDK        | 1428(528)-1429(226)   |
|            |        |        |                                | DK(\$1)IR             |                       |
| 8          | 3      | 550.65 | 1649.94                        | SEENSLIK(\$1)R        | 1429(263)-1428(371)   |
|            |        |        |                                | TGK(\$1)K             |                       |

<sup>a</sup>Sso1428 and Sso1429 were searched and represented separately.

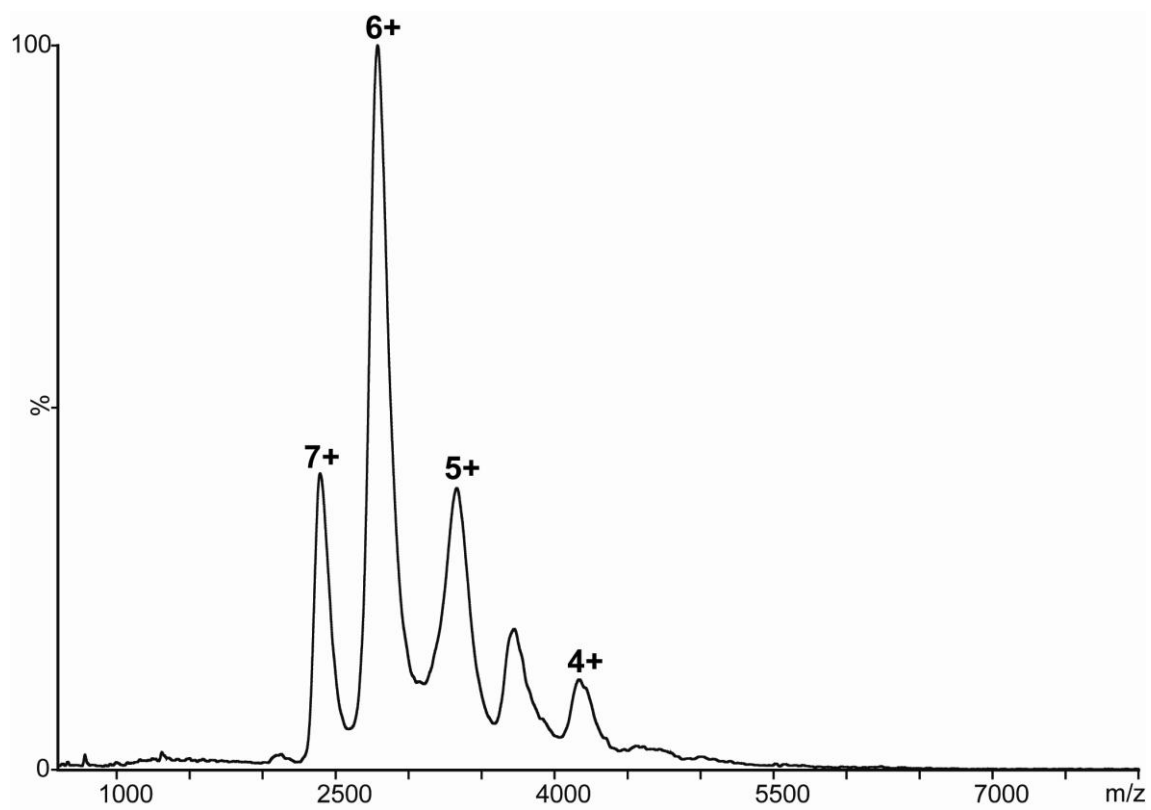

**Figure S1 MS spectrum recorded for crRNA molecules extracted from the CSM complex.** The spectrum shows a single charge state series with a mass centred around 16,520 Da. The broad charge state peaks are consistent with the sequence heterogeneity of the crRNA. (related with figure 3)

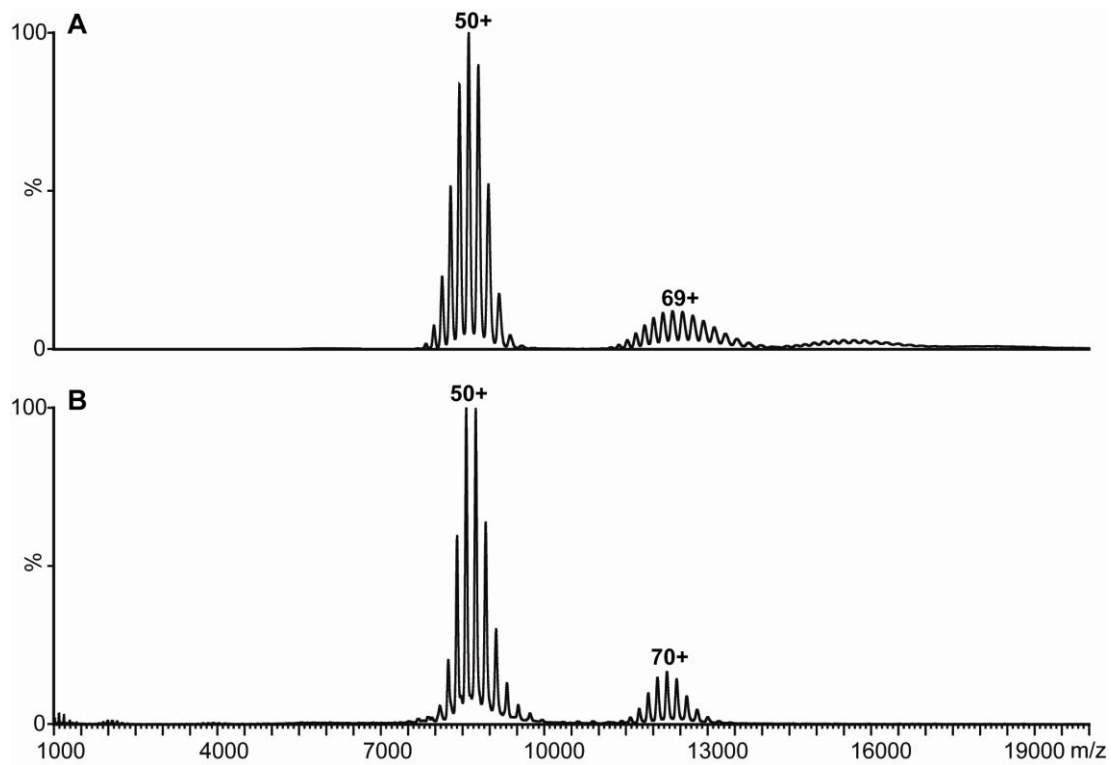

**Figure S2 MS spectra recorded for the intact CSM complex purified with a 10×His-tag attached to the subunit Sso1431 (A) or Sso1428 (B).** Both spectra show a single well resolved charge state series with a measured mass of 427,611 Da (A) or 427,789 Da (B), suggesting a homologous complex with the subunits Sso1431 and 1428 present in stoichiometric amounts. (related with figure 3)

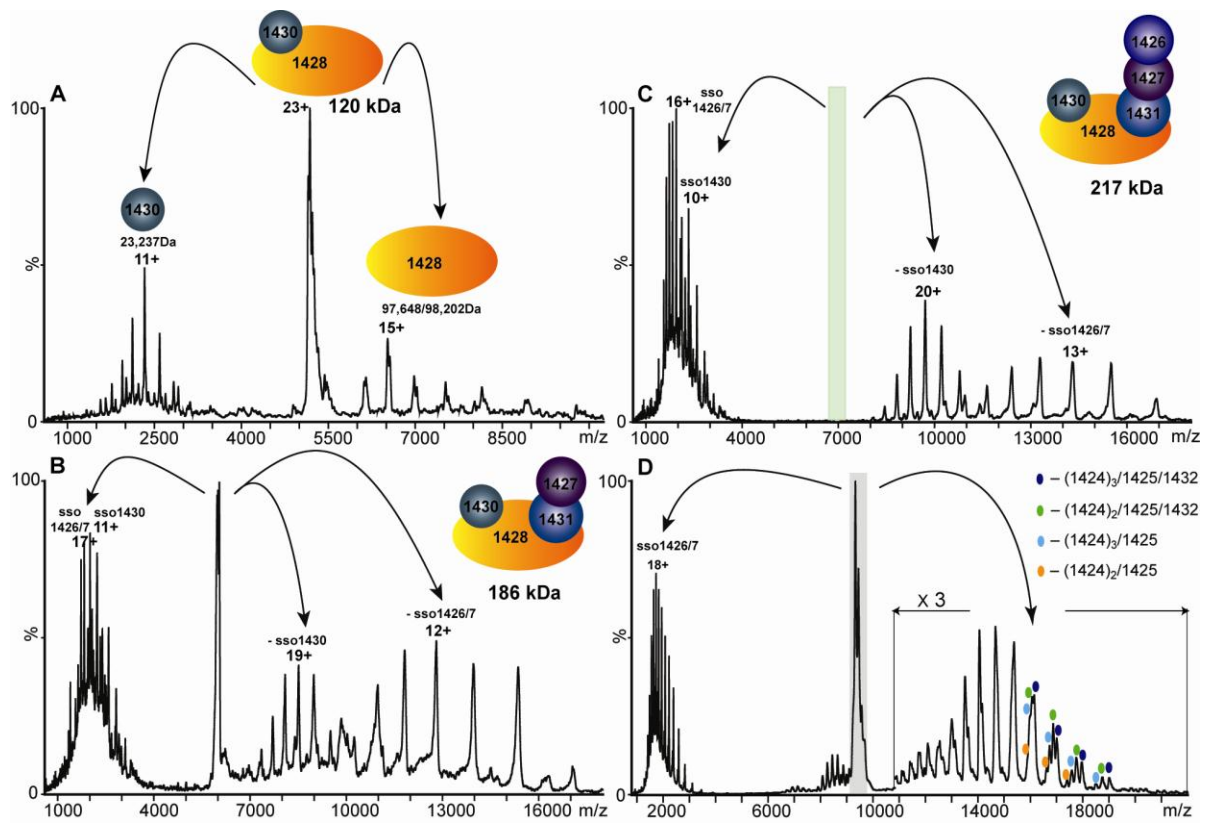

**Figure S3 Tandem MS spectra of CSM subcomplexes** CID experiments of the 120 kDa (A), 186 kDa (B) and 217 kDa (C) subcomplexes enabled assignment of the “core” of CSM comprising single copies of sso1428, 1430, 1431 and two copies of 1426/7. A mixed selection of parent ions in (D) lead to split CID peaks, and were assigned to sub-complexes having lost different combinations of the subunit sso1424, 1425 and 1432.

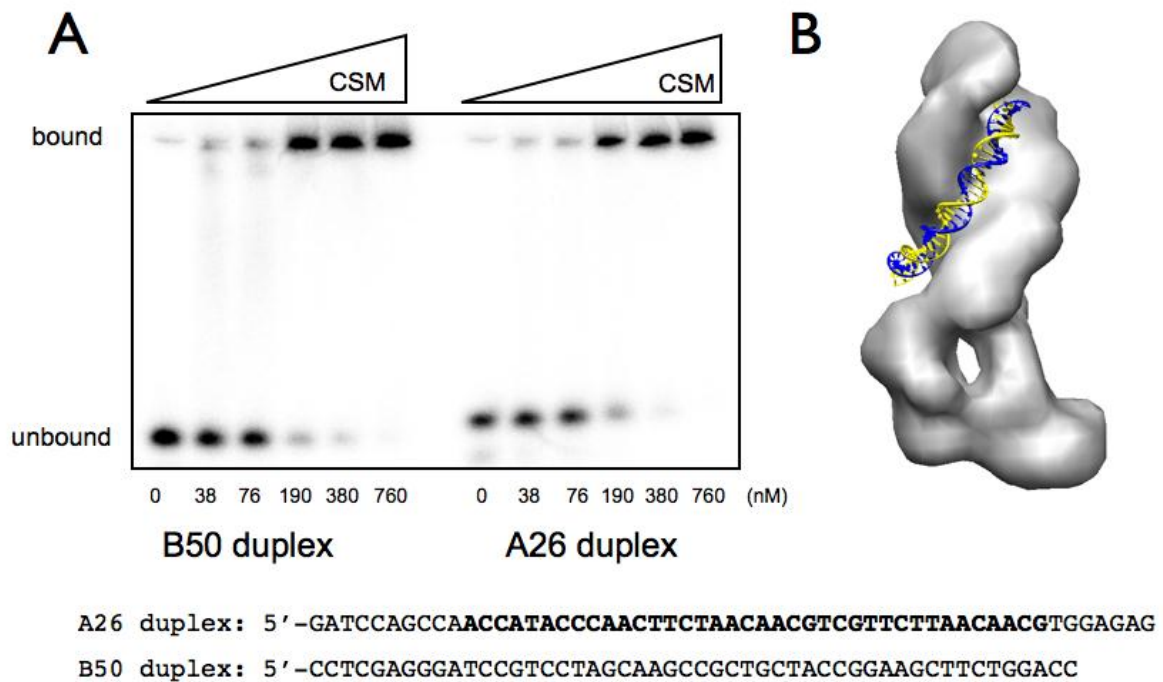

**Figure S4. Double-stranded DNA binding by the purified CSM complex**

**A.** The CSM complex was incubated with labelled duplex DNA species (corresponding to the abundant spacer A26 or a control sequence B50) and DNA binding was assessed by gel electrophoretic retardation. The complex shifted both species with high affinity and an apparent dissociation constant around 100 nM. This suggests that CSM possesses a dsDNA binding site, consistent with its proposed function. Sequence A26 corresponds to an abundant crRNA sequence (Locus A spacer 26) identified in the CSM complex by deep sequencing, but it only constitutes < 5% of the total crRNA bound in the complex. This probably explains the failure to observe sequence specific DNA binding by the CSM complex. The A26 spacer sequence is shown in bold text.

**B.** Model showing a 38 bp DNA duplex in complex with the CSM protein. The DNA was fitted manually to show the potential binding site along the Cas7 backbone that is thought to bind the crRNA. (related with figure 5)
